# Supplementary material
Source: PubMed Central journal article supplement (PMC5505415)
Supplement: Supplemental_File_237.pdf [file Supplemental_File_237.pdf]

The AUC during the 3 hour postprandial periods between the control and treatment groups are as follows:

### Glucose

| <b>Post prandial period</b> | <b>Control vs. Treatment<br/>Mean + SD<br/>&amp;<br/>[Mean variability (95% CI)]</b> | <b>P value</b> |
|-----------------------------|--------------------------------------------------------------------------------------|----------------|
| Dinner Day 1                | 34652 ± 5753 vs. 27092 ± 9062 mg/dl<br>[-7560 mg/dl (-12934, -2186)]                 | **P=0.001      |
| Breakfast                   | 77553 ± 13410 vs. 72686 ± 10110 mg/dl<br>[-4868 mg/dl (-13485, 3750)]                | P=0.24         |
| Lunch                       | 71519 ± 14998 vs. 70782 ± 19344 mg/dl<br>[-737.1 mg/dl (-15628, 14154)]              | P=0.92         |
| Dinner Day 2                | 92893 ± 17034 vs. 95327 ± 16777 mg/dl<br>[2434 mg/dl (-12581, 17449)]                | P=0.73         |

### Insulin

| <b>Post prandial period</b> | <b>Control vs. Treatment<br/>Mean + SD<br/>&amp;<br/>[Mean variability (95% CI)]</b> | <b>P value</b> |
|-----------------------------|--------------------------------------------------------------------------------------|----------------|
| Dinner Day 1                | 11033 ± 6577 vs. 10277 ± 6965 pmol/L<br>[-755.8 pmol/L (-2527, 1016)]                | P=0.37         |
| Breakfast                   | 11437 ± 6378 vs. 10416 ± 5020 pmol/L<br>[-1022 pmol/L (-3425, 1382)]                 | P=0.38         |
| Lunch                       | 12417 ± 7256 vs. 10735 ± 7086 pmol/L<br>[-1682 pmol/L (-3510, 147.4)]                | P=0.07         |
| Dinner Day 2                | 11532 ± 6637 vs. 10223 ± 5922 pmol/L<br>[-1310 pmol/L (-3036, 416.8)]                | P=0.13         |

## Glucagon

Post prandial period

Control vs. Treatment  
Mean + SD  
&  
[Mean variability (95% CI)]

P value

|              |                                                                      |        |
|--------------|----------------------------------------------------------------------|--------|
| Dinner Day 1 | 1446 + 600 vs. 1242 + 668 pmol/L<br>[-204.2 pmol/L (-603.4, 194.9)]  | P=0.29 |
| Breakfast    | 1733 + 810 vs. 1798 + 871 pmol/L<br>[64.71 pmol/L (-307.3, 436.7)]   | P=0.71 |
| Lunch        | 1437 + 615 vs. 1488 + 715 pmol/L<br>[50.57 pmol/L (-357.5, 458.7)]   | P=0.80 |
| Dinner Day 2 | 1470 + 510 vs. 1745 vs. 923 pmol/L<br>[275.6 pmol/L (-204.8, 755.9)] | P=0.24 |
